# Supplementary material for: A Cholera Case Imported from Bangladesh to Italy: Clinico-Epidemiological Management and Molecular Characterization in a Non-Endemic Country
Source: MDPI journal article supplement (doi:10.3390/tropicalmed8050266), 2023-05-06
Supplement: s1 [file s1]

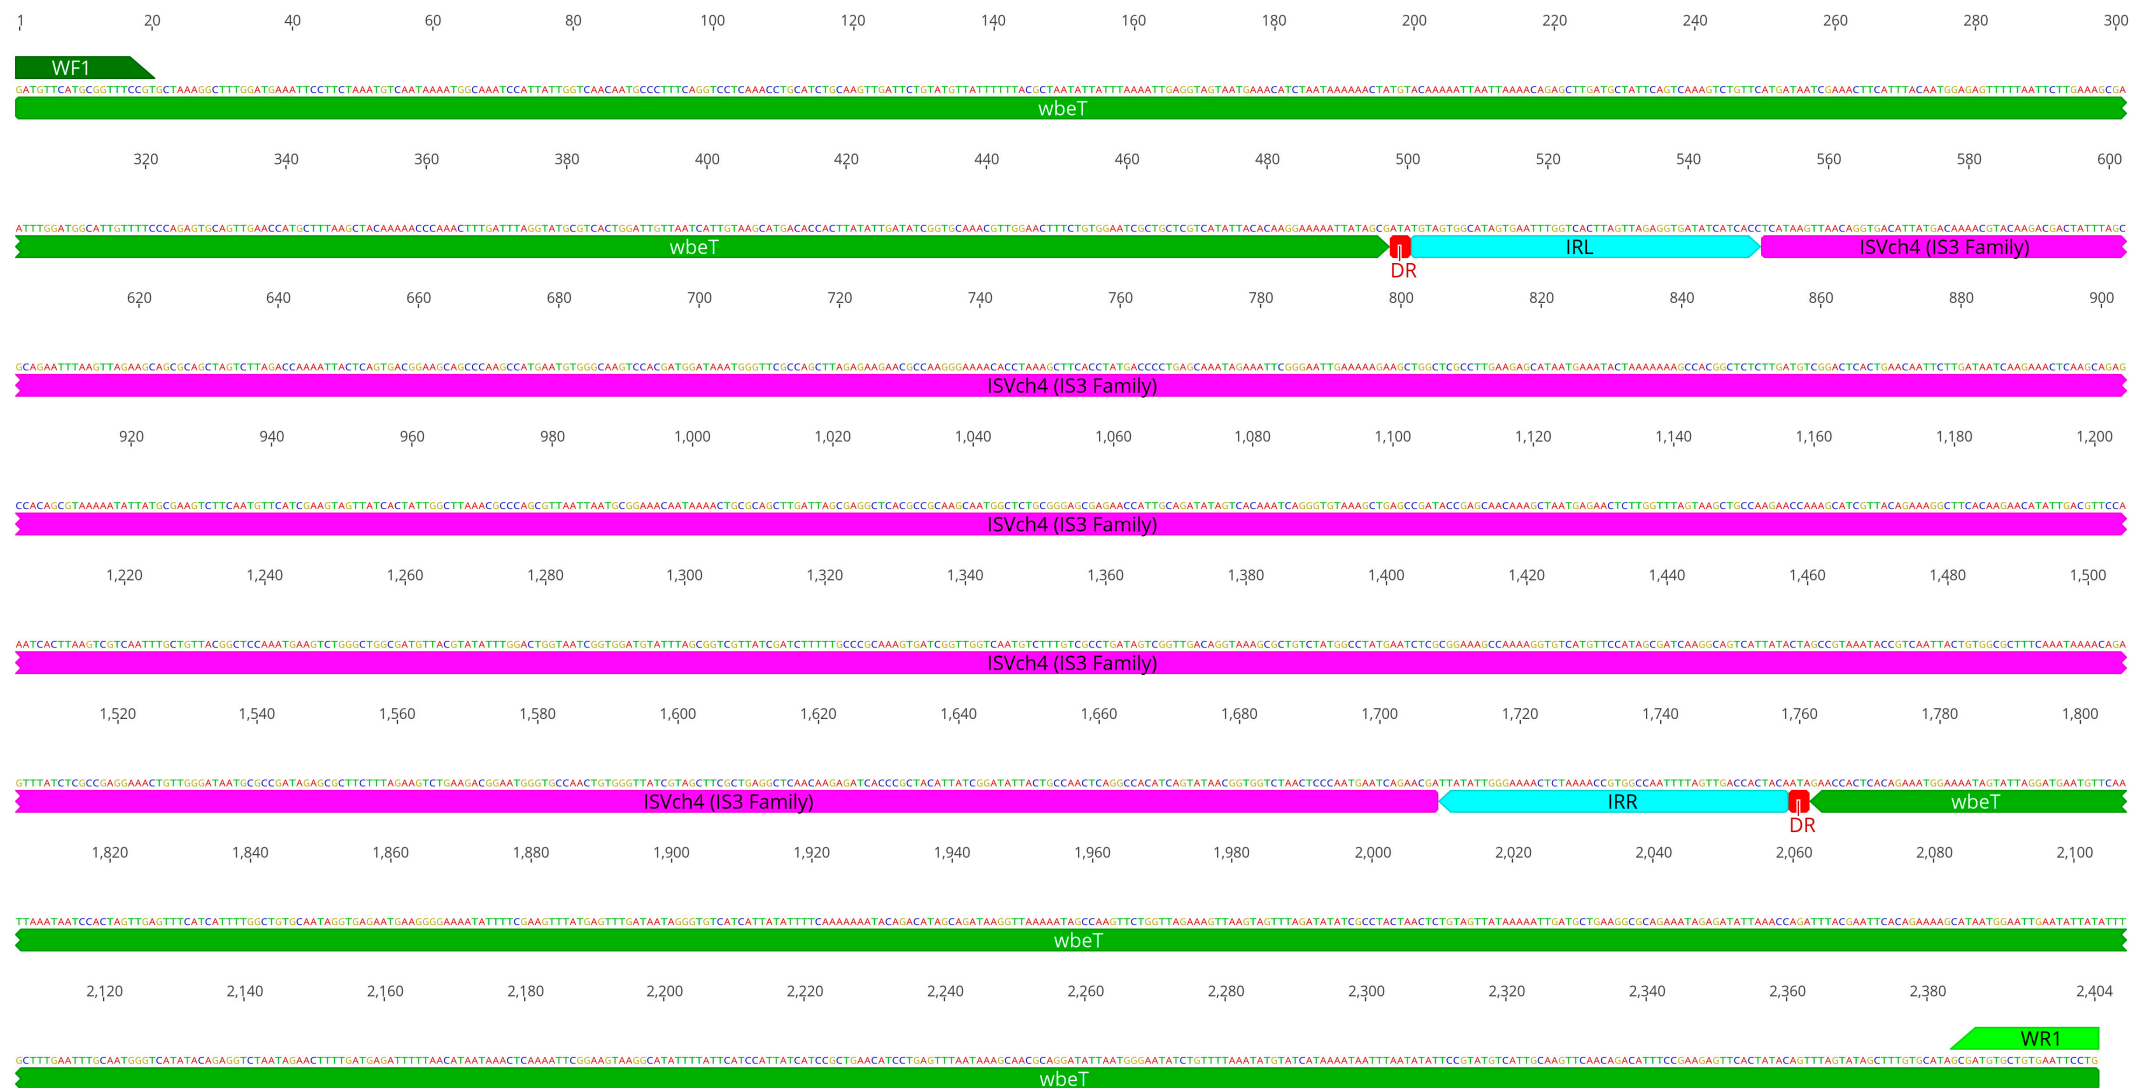

**Figure S1.** Visualisation of the gene *wbeT*. The gene *wbeT* identified in the genome with an insertion of 1261 bp, corresponding to the IS3-like element ISVch4 family transposase, *wbeT* primers (WF1–WR1) were used. DR–direct repeat; IRL–left inverted repeat; IRR–right inverted repeat.
