# Supplementary material for: A Cholera Case Imported from Bangladesh to Italy: Clinico-Epidemiological Management and Molecular Characterization in a Non-Endemic Country
Source: Trop Med Infect Dis. 2023 May 6;8(5):266. doi: 10.3390/tropicalmed8050266 (PMC10221301; doi:10.3390/tropicalmed8050266)
Supplement: Supplementary file 1 [file tropicalmed-08-00266-s001.zip › Supplementary Table S1.xlsx]

## Sheet: Foglio1
Table S1. The detailed list of the elements of VPI-I, VPI-II, VSP-I and VSP-II found.
VPI-I				VSP-I
Name	Description	Identity		Name	Description	Identity
VC0817	Putative transposae vpiT	100		VC0174	SPOR domain-containing protein	100
VC0818	Uncharacterized protein	100		VC0175	Deoxycytidylate deaminase-related protein	100
VC0819	Aldehyde dehydrogenase aldA	100		VC0176	Putative transcriptional regulator vspR	100
VC0820	ToxR-activated gene A lipoprotein tagA	100		VC0177	transcriptional regulator vspR	100
VC0821	Uncharacterized protein	99.9		VC0178	Patatin-related protein capV	100
VC0823	Uncharacterized protein	100		VC0179	Cyclic GMP-AMP synthase dncV	100
VC0824	Thiol peroxidase tpx	100		VC0180	ThiF domain-containing protein	99.9
VC0825	Toxin coregulated pilus biosynthesis protein I tcpI	100		VC0181	Prok-JAB domain-containing protein	100
VC0826	Toxin coregulated pilus biosynthesis protein P tcpP	100		VC0182	Uncharacterized	100
VC0827	Toxin coregulated pilus biosynthesis protein H tcpH	100		VC0183	Phage integrase int	100
VC0828	Toxin coregulated pilin tcpA	99.9		VC0184	Uncharacterized	100
VC0829	Toxin coregulated pilus biosynthesis protein B tcpB	99.9		VC0185	Putative transposase	100
VC0830	Toxin coregulated pilus biosynthesis protein Q tcpQ	100		VC0186	Glutathione reductage gorA	100
VC0831	Toxin coregulated pilus biosynthesis outer membrane protein C tcpC	100		VC RS00860	Uncharacterized	100
VC0832	Toxin coregulated pilus biosynthesis protein R tcpR	100		VC RS00875	Uncharacterized	100
VC0833	Toxin coregulated pilus biosynthesis protein D tcpD	100		VSP-II
VC0834	Toxin coregulated pilus biosynthesis protein S tcpS	100		Name	Description	Identity
VC0835	Toxin coregulated pilus biosynthesis protein T tcpT	100		VC0489	Putative hemolysin	100
VC0836	Toxin coregulated pilus biosynthesis protein E tcpE	100		VC0490	Uncharacterized protein	100
VC0837	Toxin coregulated pilus biosynthesis protein F tcpF	100		VC0491	Uncharacterized protein	100
VC0838	TCP pilus virulence regulatory protein toxT tcpN	100		VC0492	Uncharacterized protein	100
VC0839	Prepilin leader peptidase/N-methyltransferase tcpJ	100		VC0493	Uncharacterized protein	100
VC0840	Accessory colonization factor AcfB acfB	100		VC0494	Uncharacterized protein	100
VC0841	Accessory colonization factor AcfC acfC	99.7		VC0500a	TransposaseOrfAB,subunit a	82.5
VC0842	RDD domain-containing protein	100		VC0501b	Transposase	71.3
VC0843	TagE protein tagE	100		VC0513	AraC family transcriptional regulator	99.9
VC0844	Accessory colonization factor AcfA acfA	100		VC0514	Methyl-accepting chemotaxis protein	100
VC0845	Accessory colonization factor AcfD acfD	100		VC0515	Putative signal transduction protein	100
VC0847	Integrase intV	100		VC0516	Phage integrase	100
VPI-II				VC0517	RNA polymerase sigma factor RpoD	100
Name	Description	Identity
VC1758	Prophage integrase IntA	100
VC1759	Uncharacterized protein	100
VC1759	Uncharacterized protein	89.3
VC1760	Putative helicase	100
VC1761	VC1761	100
VC1762	EH Signature domain-containing protein	100
VC1763	Chemotaxis protein MotB-related protein	100
VC1764	Uncharacterized protein	100
VC1765	Type I site-specific deoxyribonuclease	100
VC1766	Uncharacterized protein	100
VC1767	DUF262 domain-containing protein	100
VC1768	Methylase S domain-containing protein	100
VC1769	Site-specific DNA-methyltransferase	100
VC1770	Uncharacterized protein	100
VC1771	Uncharacterized protein	100
VC1772	WYL domain-containing protein	100
VC1773	Kelch domain-containing protein	100
VC1774	N-acetylneuraminate epimerase nanM	100
VC1775	Uncharacterized protein	100
VC1776	Putative N-acetylneuraminate lyase	100
VC1777	Sialic acid TRAP transporter large permease protein SiaM	100
VC1778	Sialic acid TRAP transporter small permease protein SiaQ	100
VC1779	Sialic acid-binding periplasmic protein SiaP	100
VC1781	Putative N-acetylmannosamine-6-phosphate 2-epimerase nanE	100
VC1782	N-acetylmannosamine kinase nanK	100
VC1783	N-acetylglucosamine-6-phosphate deacetylase	100
VC1784	Sialidase nanH	100
VC1785	Transcriptional regulator	100
VC1786	UPF0758 protein	100
VC1787	Uncharacterized protein	100
VC1788	Uncharacterized protein	100
VC1789	Transposase OrfAB, subunit B	99.8
VC1791	Uncharacterized protein	100
VC1792	Uncharacterized protein	100
VC1793	Uncharacterized protein	100
VC1794	Uncharacterized protein	100
VC1795	Putative transcriptional regulator	100
VC1796	Middle operon regulator-related protein	100
VC1797	Uncharacterized protein	100
VC1798	Eha protein	100
VC1799	Integrase catalytic domain-containing protein	100
VC1800	Uncharacterized protein	100
VC1801	Uncharacterized protein	100
VC1802	Uncharacterized protein	100
VC1804	Uncharacterized protein	100
VC1805	Uncharacterized protein	100
VC1806	G domain-containing protein	100
VC1807	VC1807	100
VC1808	Uncharacterized protein	100
VC1809	Putative transcriptional regulator	100
